# Supplementary material for: Bamboo lignocellulose degradation by gut symbiotic microbiota of the bamboo snout beetle Cyrtotrachelus buqueti
Source: PubMed Central journal article supplement (PMC6442426; doi:10.1186/s13068-019-1411-1), 2019-04-01

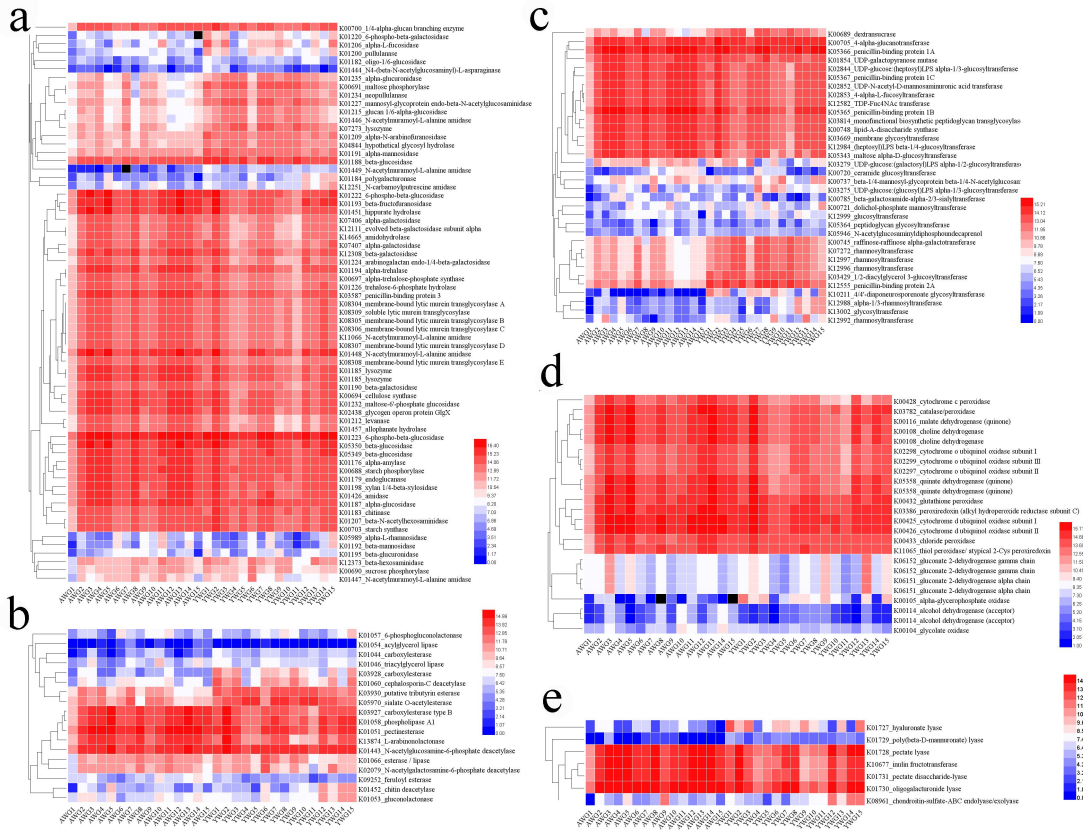

Supplement: 13068_2019_1411_MOESM6_ESM.pdf [file 13068_2019_1411_MOESM6_ESM.pdf]
